# Supplementary material for: Incidence of new-onset hypertension before, during, and after the COVID-19 pandemic: a 7-year longitudinal cohort study in a large population
Source: Springer Nature journal article supplement (doi:10.1186/s12916-024-03328-9), 2024-03-19
Supplement: MOESM1 [file 12916_2024_3328_MOESM1_ESM.pdf]

## Additional File

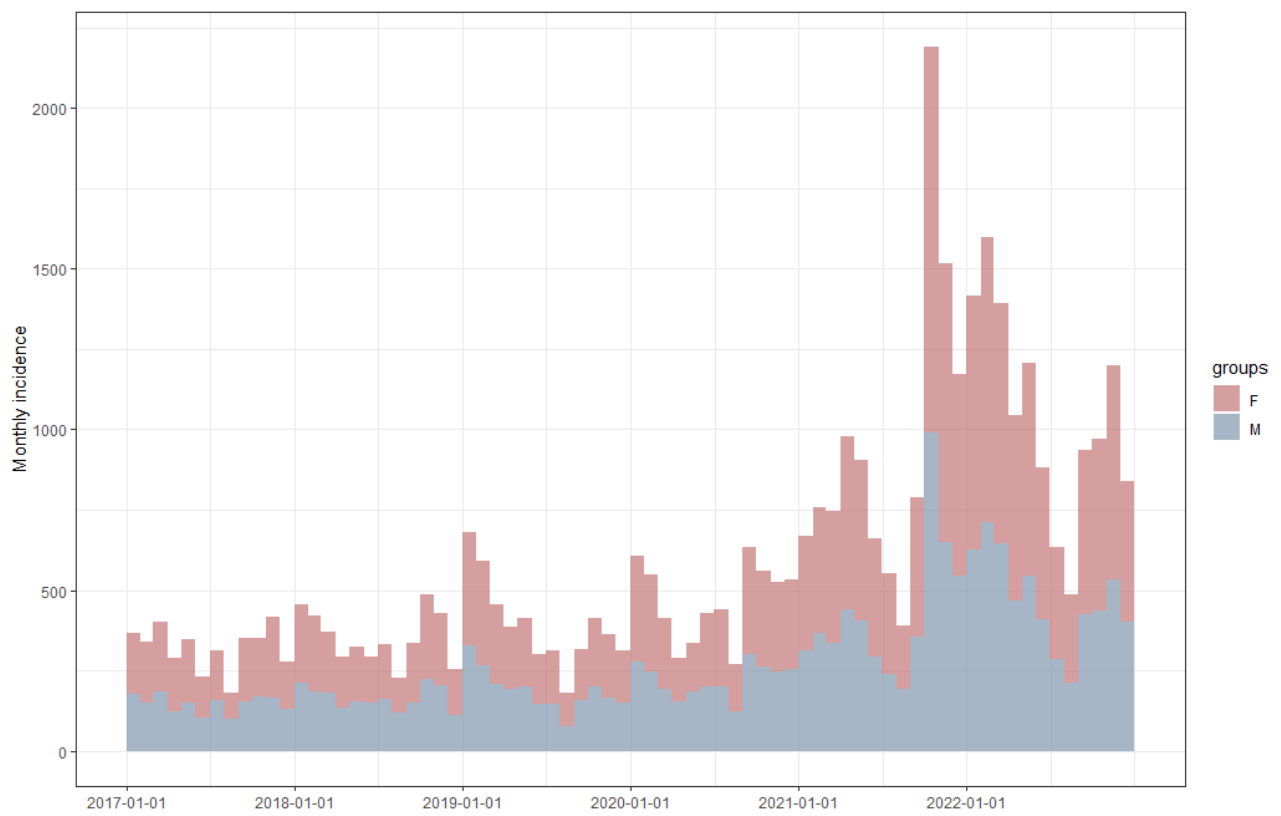

**Figure S1**

Monthly incidence of hypertension during the 6-year observation period (2017-2022) grouped by sex.

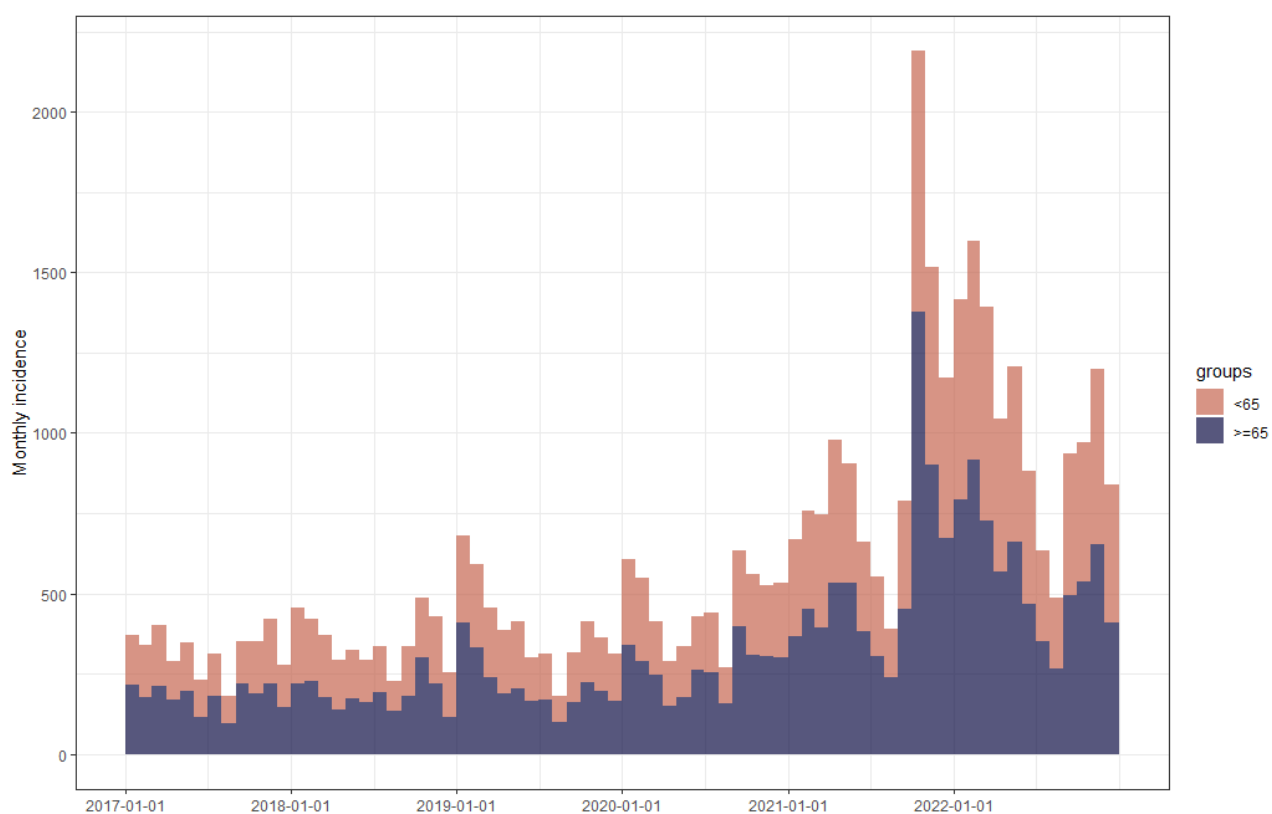

**Figure S2**

Monthly incidence of hypertension during the 6-year observation period (2017-2022) by age group.

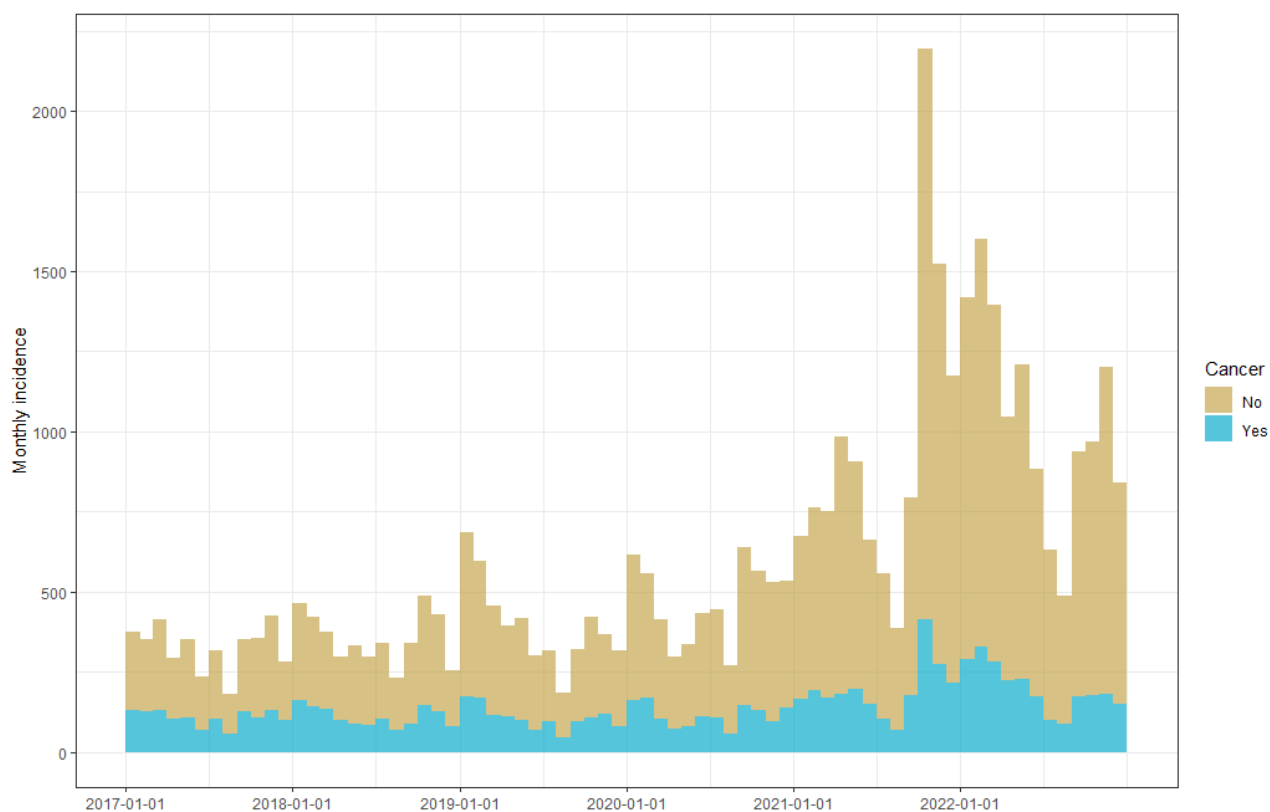

**Figure S3**

Monthly incidence of hypertension during the 6-year observation period (2017-2022) by cancer prevalence.
